# Supplementary material for: Persistent T Cell Repertoire Perturbation and T Cell Activation in HIV After Long Term Treatment
Source: Front Immunol. 2021 Feb 25;12:634489. doi: 10.3389/fimmu.2021.634489 (PMC7959740; doi:10.3389/fimmu.2021.634489)
Supplement: Supplementary File S3 — All upstream regulators and Reactome pathways of the 149 genes that are significantly up-regulated in people living with HIV versus healthy controls and known to interact with each other. [file Table_3.xlsx]

## Sheet: Upstream regulators
Upstream regulator analysis of 149 genes, significantly up-regulated in PLHIV versus HC and known to interact with each other.
Upstream Regulator	Expr Log Ratio	Molecule Type	Predicted Activation State	Activation z-score	p-value of overlap	Target Molecules in Dataset
IFNG	0.906	cytokine	Activated	4.117	7.7e-18	ACTA2,ADGRG1,APOBEC3G,APOL6,ARAP2,CCL4,CCL5,CD2,CDKN2A,CLEC2D,CXCL9,CXCR3,CYB561,DMWD,F2R,GBP1,GBP4,GBP5,GNAO1,IFNG,IL10RA,IL7,ITGA4,ITGAL,KLF10,KLRC4-KLRK1/KLRK1,LAG3,MED15,NCALD,NLRC5,OCLN,PRDM1,RUNX3,SERPINB9,SLC2A1,SLC4A4,SLFN12L,SMAD7,SYNM,TBX21,TGFBR3,TLR3,TXNIP,VCAM1
TCR		complex	Activated	2.959	1.03e-15	CBLB,CCL4,CCL5,CD8B,CXCL9,CXCR3,EOMES,FYN,GBP4,GFI1,GZMA,IFNG,IL7,NFATC2,PIK3R3,PRDM1,RASGRP1,SLC2A1,SMAD7,TBX21,TLR3,TNFAIP3,TNIP3
ID3		transcription regulator		0.44	3.41e-14	ADGRG1,CCL5,CDKN2A,CXCR3,EOMES,IFNG,IKZF3,IL10RA,PRDM1,PTPN22,RAP1GAP,SH2D1A,SLAMF6,SMAD7,SOX13,TGFBR3,VCAM1
IL10		cytokine		0.448	8.25e-14	ACTA2,ARAP2,CCL4,CCL5,CD2,CXCL9,CXCR3,GZMA,IFNG,IL10RA,IL7,INPP5D,ITGA4,ITGAL,KLRC4-KLRK1/KLRK1,KLRD1,LAG3,PRDM1,TLR3,TNIP3,VCAM1
IL2		cytokine	Activated	3.55	1.57e-13	APOBEC3G,BHLHE40,CCL4,CCL5,CD2,CD3G,CD8A,CXCR3,EOMES,FYN,GFI1,GZMA,IFNG,IL10RA,IL2RG,ITGA4,KLRC4-KLRK1/KLRK1,KLRD1,OSBPL3,PIK3R3,PPP2R2B,PRDM1,SERPINB9,TBX21,TGFBR3,TIGIT
IL4		cytokine		1.021	1.75e-13	ABCA2,ACTA2,ATP1A3,BHLHE40,CCL4,CCL5,CD2,CD8A,CST7,CXCL9,CXCR3,DDHD1,EOMES,F2R,GBP5,GFI1,GZMA,IFNG,IFNLR1,IL10RA,ITGA4,ITGAL,KLRD1,NFATC2,PRDM1,RNF213,SH2D1A,SLAMF7,SLC2A1,SOX13,TBX21,VCAM1
ID2		transcription regulator		1.32	2.96e-13	ACTA2,CCL5,CDKN2A,CXCR3,EOMES,IFNG,IKZF3,IL10RA,PTPN22,RAP1GAP,SH2D1A,SLAMF6,SMAD7,SOX13,TGFBR3,VCAM1
CD28		transmembrane receptor	Activated	3.127	4.74e-13	BHLHE40,CBLB,CCL4,CXCR3,EOMES,FYN,GBP1,GZMA,HBG1,IFNG,IL10RA,IL7,ITGA4,ITGAL,NFATC2,PRDM1,SH2D2A,STOM,TBX21,TNFAIP3
TGFB1		growth factor		1.003	4.48e-12	ACTA2,ATXN1,BHLHE40,CCL4,CCL5,CDKN2A,CLEC2D,CXCR3,CYB561,EOMES,F2R,FYN,GBP1,GFI1,GNAO1,GZMA,IFNG,IL10RA,INPP5D,ITGA4,ITGAL,KLF10,KLRC4-KLRK1/KLRK1,KLRD1,LPAR1,NFATC2,NUAK1,OCLN,PRDM1,RACGAP1,RASGRP1,RUNX3,SLC20A1,SLC2A1,SMAD7,SNTB2,TBX21,TGFBR3,TNFAIP3,TXNIP,VCAM1
CD40		transmembrane receptor	Activated	2.417	3.46e-11	APOBEC3G,CCL4,CCL5,CD8A,CLEC2D,IFNG,IL10RA,ITGAL,PRDM1,SLAMF7,SLC2A1,SMAD7,TBX21,TNFAIP3,VCAM1
TBX21	0.587	transcription regulator	Activated	2.146	3.85e-11	CCL4,CXCR3,EOMES,GZMA,IFNG,KLRD1,NKG7,PRDM1,RUNX3,TBX21
STAT1		transcription regulator	Activated	3.277	6.47e-11	APOBEC3G,APOL6,CCL4,CCL5,CXCL9,CXCR3,GBP1,GBP4,GBP5,HBG1,IFNG,NLRC5,RNF213,SLAMF8,SLFN12L,SMAD7,TBX21,TLR3
STAT3		transcription regulator		0.636	9.61e-11	ACTA2,CCL4,CCL5,CDKN2A,CXCL9,CXCR3,EOMES,GBP5,HBG1,IFNG,IKZF3,IL7,KLRC4-KLRK1/KLRK1,NFATC2,PRDM1,RALGDS,SERPINB9,SLC2A1,SLFN12L,SMAD7,TBX21,TLR3
Interferon alpha		group	Activated	4.142	2.58e-10	APOBEC3G,CCL5,CD8A,CXCL9,CXCR3,CYB561,GBP1,IFNG,IFNLR1,IL10RA,IL7,ITGA4,NKG7,RNF213,SERPINB9,SLFN12L,TBX21,TLR3,VCAM1
ITK		kinase	Activated	2.097	2.87e-10	CCL5,EOMES,F2R,IFNG,IL10RA,KLRD1,SLAMF7,SLC2A1,STYK1,TBX21
CD3		complex	Activated	3.387	4.21e-10	CCL4,CCL5,CD2,CD8A,CD8B,CXCR3,EOMES,FYN,GBP1,GFI1,GZMA,HBG1,IFNG,IL2RG,ITGA4,NFATC2,PTPN22,SH2D2A,STOM,TBX21,TNFAIP3,WEE1
IL7	0.564	cytokine	Activated	2.421	4.25e-10	CBLB,CCL4,CD2,CD3G,CD8A,CD8B,GFI1,IFNG,IL7,KLRC4-KLRK1/KLRK1,SLC2A1,SMAD7
TNF		cytokine	Activated	4.285	5.63e-10	ACTA2,ATP2B4,BHLHE40,CCL4,CCL5,CDKN2A,CLCF1,CLEC2D,CST7,CXCL9,CXCR3,FYN,GBP1,GBP4,IFNG,IL10RA,IL7,INPP5D,ITGA4,ITGAL,KLF10,MSC,NFATC2,NUAK1,OCLN,PRDM1,PRSS23,RGS9,SERPINB9,SLC20A1,SLC2A1,SMAD7,TBX21,TLR3,TNFAIP3,TRPC3,TXNIP,VCAM1
ITGB2		transmembrane receptor		1.51	1.16e-09	ACTA2,CCL4,IFNG,ITGA4,ITGAL,TBX21,TNIP3,VCAM1
IFNA2		cytokine	Activated	3.064	1.17e-09	APOL6,CCL5,CDKN2A,CXCL9,CXCR3,GAB3,GBP1,GBP4,IFNG,SERPINB9,SH2D1A,TBX21,TLR3,VCAM1
IL12 (complex)		complex		1.583	1.94e-09	CCL4,CCL5,CXCR3,EOMES,GZMA,IFNG,ITGA4,ITGAL,KLRC4-KLRK1/KLRK1,KLRD1,PRDM1,SH2D1A,TBX21
IL21		cytokine	Activated	2.26	3.32e-09	CCL4,CCL5,CD2,CXCR3,EOMES,GBP5,GZMA,IFNG,KLRC4-KLRK1/KLRK1,KLRD1,PRDM1,TBX21
IL10RA	0.274	transmembrane receptor	Inhibited	-3.357	3.9e-09	CCL5,CST7,DDHD1,GBP5,GPR171,IFNG,IL2RG,NLRC5,OCLN,RNF213,SERPINB9,SLAMF6,SLAMF8,SLC2A1,TARM1
KLF2		transcription regulator		0.144	4.55e-09	CCL4,CCL5,CXCR3,IFNG,IL2RG,ITGA4,PRDM1,SERPINB9,SLC2A1,TBX21,VCAM1,WEE1
IL27		cytokine	Activated	3.232	5.07e-09	CCL4,CCL5,CXCL9,EOMES,IFNG,IFNLR1,LAG3,PRDM1,TBX21,TLR3,VCAM1
IKZF2		transcription regulator	Inhibited	-2.611	5.15e-09	CD2,GZMA,IFNG,IKZF3,IL10RA,LAG3,RUNX3
Tcf7		transcription regulator	Inhibited	-2.388	9.17e-09	CCL4,EOMES,FYN,GZMA,IFNG,PRDM1,TBX21
IL15		cytokine	Activated	2.569	9.68e-09	CCL4,CCL5,CD2,CD84,CD8A,CD8B,EOMES,FYN,IFNG,IL2RG,KLRC4-KLRK1/KLRK1,KLRD1,PIK3R3,PRDM1,SMAD7,TBX21,VCAM1
Tgf beta		group		0.425	1.31e-08	ACTA2,BHLHE40,CCL4,CCL5,CDKN2A,IFNG,INPP5D,KLF10,RUNX3,SLFN12L,SMAD7,SSBP3,TBX21,VCAM1
BCR (complex)		complex	Activated	2.73	2.84e-08	CCL4,CDKN2A,CLEC2D,IFNG,ITGA4,PRDM1,PTPN22,SLAMF7,SLC2A1,TBX21
ICAM1		transmembrane receptor		1.941	2.97e-08	ACTA2,CCL4,CCL5,IFNG,ITGA4,ITGAL,VCAM1
ZBTB16		transcription regulator		0.518	5.27e-08	CD2,CD3G,CD8A,CXCR3,F2R,IL10RA,RUNX3,SLAMF6,SLC2A1,SOX13
MIF		cytokine		1.761	1.1e-07	ACTA2,CCL4,CD84,F2R,GFI1,IFNG,IL7,ITGA4,VCAM1
GATA3		transcription regulator		-0.872	1.23e-07	CCL4,CCL5,EOMES,GZMA,IFNG,ITGAL,NKG7,RUNX3,SERF1A/SERF1B,SLC2A1,TBX21,VCAM1
IRF4		transcription regulator		-1.875	1.35e-07	CDKN2A,CXCL9,EOMES,GBP1,IFNG,INPP5D,ITGAL,PRDM1,SLC2A1,TBX21
U1 snRNP		complex		1.951	1.42e-07	CCL4,CCL5,IFNG,SLAMF7
Immunoglobulin		complex	Activated	2.247	1.7e-07	ACTA2,CCL4,CCL5,CXCL9,GFI1,IFNG,IL10RA,ITGA4,KLRD1,LAG3,OSBPL3,PRDM1,SLC2A1,TBX21,TGFBR3,TIGIT,VCAM1
CSF2		cytokine	Activated	2.833	2.4e-07	ATXN1,CCL4,CD8A,CLCF1,CXCR3,F2R,IFNG,IFNLR1,INPP5D,ITGA4,NFATC2,RACGAP1,SERPINB9,SLAMF7,SLC2A1,TNFAIP3
Ifnar		group	Activated	2.813	2.62e-07	CCL5,CD8A,IFNG,ITGA4,NLRC5,RNF213,TLR3,VCAM1
P38 MAPK		group	Activated	3.255	2.92e-07	CCL5,CDKN2A,CXCL9,GBP1,IFNG,ITGA4,NFATC2,OCLN,PRDM1,RYR1,SATB2,TBX21,TRPC3,VCAM1
TNFSF11		cytokine	Activated	3.227	2.99e-07	CCL4,CCL5,IFNG,ITGAL,NFATC2,PRDM1,RACGAP1,RALGDS,SERPINB9,SLC20A1,SLC2A1,VCAM1
FAS		transmembrane receptor		1.516	3.01e-07	ACTA2,ARAP2,CCL4,CCL5,CXCL9,CXCR3,GBP1,IFNG,IL10RA,INPP5D,SERPINB9,SNTB2,TNFAIP3,VCAM1
Map3k7		kinase	Activated	2.6	3.3e-07	BHLHE40,CCL4,CCL5,IFNG,NFATC2,TLR3,VCAM1
IKK (complex)		complex	Activated	2.2	3.3e-07	CCL5,EOMES,IFNG,TBX21,VCAM1
Ifn gamma		complex		1.89	3.62e-07	APOBEC3G,CCL5,CDKN2A,CXCL9,CXCR3,GBP1,SH2D1A,TLR3
PTPRC		phosphatase		1.982	3.89e-07	CCL4,CCL5,CXCR3,IFNG,IL7,VCAM1
IL1B		cytokine	Activated	2.896	4.66e-07	ACTA2,APOL6,CCL4,CCL5,CXCL9,GBP1,IFNG,IL10RA,IL7,KLF10,NFATC2,OCLN,PRDM1,SERPINB9,SLC20A1,SLC2A1,SMAD7,TBX21,TLR3,TNFAIP3,TXNIP,VCAM1
IL18		cytokine	Activated	3.065	4.78e-07	CCL4,CCL5,CXCL9,IFNG,INPP5D,ITGAL,KLRC4-KLRK1/KLRK1,NKG7,TBX21,VCAM1
Smad		complex		1.387	6.55e-07	CDKN2A,IFNG,INPP5D,SMAD7,TBX21
Histone h3		group			6.59e-07	CCL5,CDKN2A,EOMES,GATA6,GFI1,IFNG,PPP2R2B,PRDM1,RPS9,SATB2,STOM,SYNE2,TBX21,TNFAIP3,ZBTB44
IFNB1		cytokine		1.953	8.34e-07	APOL6,BHLHE40,CCL4,CCL5,CXCL9,F2R,GBP4,GBP5,IFNG,KLRC4-KLRK1/KLRK1,PRDM1,TLR3
PRKD1		kinase	Activated	2.425	8.79e-07	CCL4,CCL5,CD2,IFNG,TNFAIP3,VCAM1
VEGFA		growth factor		1.657	1.19e-06	ACTA2,CDKN2A,EOMES,GBP1,IFNG,INPP5D,ITGA4,LAG3,NFATC2,OCLN,SYNM,VCAM1
OSM		cytokine	Activated	2.195	1.22e-06	ACTA2,ATP2B4,BHLHE40,CCL5,GBP1,IFNG,IL7,ITGAL,KLF10,MSC,NUAK1,PRDM1,RAP2A,SYNE1,TLR3,VCAM1
STAT6		transcription regulator		-0.476	1.27e-06	CCL5,CD2,CST7,DDHD1,GBP5,GFI1,IFNG,IL10RA,MYO6,NFATC2,RNF213,SOX13,TBX21,VCAM1
CD44		other	Activated	2.345	1.7e-06	ABCA2,ACTA2,CCL4,CCL5,CD8A,CD8B,CXCR3,IFNG,ITGA4,VCAM1
GNAI2		enzyme		0.283	1.71e-06	BHLHE40,F2R,IFNG,ITGA4,ITGAL
RELA		transcription regulator		1.804	1.76e-06	ACTA2,BHLHE40,CCL5,CDKN2A,CXCL9,EOMES,GBP1,IFNG,KLF10,PRDM1,SMAD7,TBX21,TNFAIP3,VCAM1
IL12 (family)		group		1.638	2.46e-06	CCL4,CCL5,IFNG,KLRC4-KLRK1/KLRK1,NFATC2,NKG7,SH2D1A,TBX21
CSF1		cytokine	Activated	2.578	2.59e-06	CCL5,F2R,GAB3,IFNG,IL10RA,ITGA4,SLC2A1,SLFN12L,TNFAIP3,VCAM1
CD14		transmembrane receptor		1.961	2.74e-06	CCL4,CCL5,IFNG,IL10RA,TNFAIP3,VCAM1
NFKB1		transcription regulator	Activated	2.396	3.05e-06	BHLHE40,CCL4,CCL5,CD3G,CXCL9,GBP1,GNAO1,IFNG,TBX21,TNFAIP3,VCAM1
RAP1B		enzyme			3.07e-06	CCL4,CCL5,IFNG
CREBBP		transcription regulator		-0.555	3.1e-06	CCL5,CST7,CXCL9,CXCR3,EOMES,GFI1,IFNG,IL10RA,SH2D1A,SLAMF6,STOM,TNFAIP3,VCAM1
ZBTB7B		transcription regulator	Inhibited	-2.219	3.27e-06	CD8A,CD8B,EOMES,IFNG,RUNX3
BCL10		transcription regulator			3.54e-06	CCL4,CCL5,IFNG,TNFAIP3
MAPK1		kinase		-1.151	6.06e-06	APOL6,CCL4,CCL5,CD84,GBP1,GBP5,IFNG,LAG3,NKG7,OSBPL3,TBX21,TLR3
RDH8		enzyme			6.12e-06	CCL4,IFNG,TLR3
GFI1	0.845	transcription regulator		-1.081	8.14e-06	F2R,GFI1,GZMA,IFNG,LPAR1,NLRC5,RASGRP1,RUNX3
RIPK2		kinase	Activated	2.388	8.31e-06	CCL5,IFNG,MCOLN2,RALGDS,RASGRP1,VCAM1
Tnf (family)		group	Activated	2.243	8.55e-06	CCL4,CCL5,CXCL9,GFI1,IFNG,OCLN,TNFAIP3,VCAM1
IFNAR1		transmembrane receptor	Activated	2.129	8.98e-06	CCL4,CCL5,GBP4,IFNG,SLFN12L,TLR3,TNFAIP3,VCAM1
Klra7 (includes others)		transmembrane receptor			9.23e-06	CCL4,CCL5,IFNG,TBX21
IRF3		transcription regulator		1.313	1.01e-05	CCL4,CCL5,GBP1,GBP5,IFNG,LAG3,NLRC5,TLR3,TNFAIP3
ULBP2		transmembrane receptor			1.07e-05	CCL4,IFNG,KLRC4-KLRK1/KLRK1
SH3RF1		enzyme			1.07e-05	EOMES,IFNG,TBX21
KLRB1		transmembrane receptor			1.07e-05	CCL4,CCL5,IFNG
Klrk1		transmembrane receptor			1.07e-05	CCL4,CCL5,IFNG
IFNE		cytokine		1.964	1.08e-05	APOBEC3G,CXCL9,IFNG,SLC2A1,TLR3
RNASE1		enzyme		1.982	1.13e-05	CCL4,CCL5,CXCL9,IL7
NOD2		other		1.538	1.15e-05	CCL5,IFNG,MCOLN2,RALGDS,RASGRP1,TNFAIP3
LDL		complex		1.229	1.18e-05	CCL4,CCL5,CDKN2A,IFNG,IL10RA,MSC,NPC1,TGFBR3,TNFAIP3,VCAM1
CISH		other		-1.732	1.38e-05	EOMES,IFNG,PRDM1,TBX21
EGR2		transcription regulator		1.385	1.51e-05	BHLHE40,CBLB,DLG3,IFNG,LAG3,PRDM1,TBX21,TGFBR3
SPHK1		kinase		-0.439	1.51e-05	ACTA2,CCL5,CDKN2A,IFNG,SLC2A1
IgG		complex	Activated	2.006	1.61e-05	ADGRG1,CCL4,CCL5,IFNG,INPP5D,SLAMF7,TLR3,TNFAIP3,VCAM1
MYD88		other	Activated	2.936	1.64e-05	CCL4,CCL5,IFNG,IL7,INPP5D,ITGA4,LPAR1,TBX21,TNFAIP3,VCAM1
DEPTOR		other			1.7e-05	CCL5,CXCL9,VCAM1
NCR3		transmembrane receptor			1.7e-05	CCL4,CCL5,IFNG
MAPK9		kinase		0.215	1.72e-05	CCL5,CDKN2A,EOMES,IFNG,SLFN12L,TBX21,TLR3,TNFAIP3
Ige		complex	Activated	3.221	1.8e-05	CCL4,CCL5,CLCF1,F2R,FYN,IFNG,PTPN22,RALGDS,RAPGEF1,RASGRP1,VCAM1
CD40LG		cytokine	Activated	2.681	2e-05	APOBEC3G,CCL4,CCL5,CD8A,CXCR3,IFNG,IL10RA,ITGA4,PRDM1,RUNX3,TNFAIP3,VCAM1
ETS1		transcription regulator		1.463	2e-05	CCL5,CDKN2A,CRTAM,GZMA,IFNG,PRDM1,RUNX3,SLAMF6,TBX21
C5		cytokine		0.365	2.3e-05	ACTA2,CCL4,CCL5,IFNG,SMAD7,TNFAIP3,VCAM1
mir-21		microRNA		-1.686	2.32e-05	ACTA2,CDKN2A,GBP5,IFNG,INPP5D,NLRC5,RACGAP1,SMAD7,TBX21,VCAM1
CCL3		cytokine		1.948	2.35e-05	APOBEC3G,CCL4,CXCL9,IFNG
HSPD1		enzyme		0.246	2.35e-05	IFNG,NFATC2,TBX21,VCAM1
CD244		transmembrane receptor			2.53e-05	CCL4,CCL5,IFNG
DUSP16		phosphatase			2.53e-05	IFNG,TBX21,VCAM1
PIK3R1		kinase		1.744	2.72e-05	ACTA2,CCL4,IFNG,SLC2A1,TXNIP,VCAM1
STAT5A		transcription regulator			2.95e-05	CXCR3,EOMES,GZMA,IFNG,KLF10,PRDM1,PRSS23,SLC2A1,TBX21,TXNIP
NLRP3		other		1.706	3.1e-05	ACTA2,CCL4,CCL5,CXCR3,IFNG,TBX21
NFkB (complex)		complex	Activated	3.47	3.26e-05	CCL4,CCL5,CLCF1,CST7,CXCL9,EOMES,IFNG,IL10RA,ITGAL,PRDM1,SLC2A1,SMAD7,TNFAIP3,TRPC3,VCAM1
NFKBIB		transcription regulator		0.333	3.33e-05	CCL5,IFNG,RYR1,SMAD7,VCAM1
ZEB2		transcription regulator		-0.447	3.33e-05	CDKN2A,GZMA,INPP5D,NKG7,VCAM1
TP53		transcription regulator		0.829	3.36e-05	ABCA2,ACTA2,ARAP2,ATXN1,BHLHE40,CCL4,CCL5,CDKN2A,F2R,FYN,GATA6,GBP1,IFNG,IL10RA,IL7,MAP4K1,MYO6,PIK3R3,PRDM1,RACGAP1,RAP2A,SERPINB9,SH2D1A,SLC2A1,SMAD7,STOM,TLR3,USP28,WEE1
NCR1		transmembrane receptor			3.6e-05	CCL4,CCL5,IFNG
CDKN2A	0.68	transcription regulator		1.111	3.93e-05	ACTA2,CCL4,CCL5,CDKN2A,HOXB9,HOXC4,IFNG,IL2RG,SNTB2,TCF19
TLR9		transmembrane receptor	Activated	2.804	4.52e-05	ARRDC4,CCL4,CCL5,CXCL9,IFNG,IL10RA,PRDM1,STYK1,TBX21
STAT4 dimer		complex			4.62e-05	IFNG,TBX21
MLXIP		transcription regulator			4.62e-05	ARRDC4,TXNIP
PDX1		transcription regulator			4.75e-05	ARRDC4,KLF10,PRSS23,SLC2A1,SSBP3,TGFBR3,TRPC3,TXNIP
BRD4		kinase	Activated	2.401	4.78e-05	ACTA2,BHLHE40,GFI1,ITGA4,MAP4K1,PRDM1,PTPN22
ABCA4		transporter			4.92e-05	CCL4,IFNG,TLR3
TXK		kinase			4.92e-05	EOMES,IFNG,TBX21
MAPK14		kinase		1.968	4.93e-05	ACTA2,CCL5,CDKN2A,IFNG,SH2D2A,SLFN12L,TBX21,VCAM1
ERK		group	Activated	2.804	4.98e-05	ACTA2,APOBEC3G,CCL4,IFNG,KLF10,PRDM1,SLC2A1,TBX21,TRPC3
IL12B		cytokine	Activated	2.219	5.12e-05	CCL5,EOMES,IFNG,INPP5D,VCAM1
IL17A		cytokine	Activated	2.132	5.13e-05	ACTA2,CCL4,CCL5,IFNG,OCLN,SLC2A1,TLR3,TNFAIP3,VCAM1
TIRAP		other		-0.762	5.66e-05	CCL4,CCL5,IFNG,VCAM1
MAP2K1		kinase	Activated	2.03	5.71e-05	ACTA2,ADGRG1,APOBEC3G,CCL4,CCL5,CDKN2A,F2R,RAP1GAP
TICAM1		other	Activated	2.55	5.99e-05	CCL4,CCL5,IFNG,LPAR1,TLR3,TNFAIP3,VCAM1
Smad2/3		group			6.02e-05	CDKN2A,EOMES,RUNX3,SMAD7,TBX21
CORT		other		-1.969	6.43e-05	CCL4,CCL5,IFNG,SLC20A1
TREM1		transmembrane receptor		1.195	6.59e-05	ARRDC4,CCL5,CRTAM,IFNG,MCOLN2,NPC1,SLAMF7,TNIP3
SMAD3		transcription regulator		0.279	6.76e-05	ACTA2,CCL4,CDKN2A,GZMA,IFNG,INPP5D,LPAR1,SMAD7,TBX21
CXCL12		cytokine		1.886	6.83e-05	ACTA2,CCL5,CD3G,FYN,IFNG,ITGAL,RUNX3,RYR1
Fcer1		complex		1.949	7.04e-05	CCL4,CCL5,FYN,IFNG,NFATC2
NR1H2		ligand-dependent nuclear receptor		0	7.13e-05	ABCA2,CCL4,CCL5,GBP4,IFNG,ITGAL
TLR3	0.585	transmembrane receptor	Activated	2.738	7.39e-05	ARRDC4,CCL4,CCL5,GBP4,IFNG,PIK3R3,SERPINB9,STYK1,TLR3
F2RL1		G-protein coupled receptor			7.59e-05	ACTA2,GBP4,IFNG,MSC,TXNIP
MAP3K8		kinase		1.706	8.08e-05	CCL4,GFI1,GPR171,IFNG,SLFN12L,TBX21,TXNIP
NFATC1		transcription regulator		1.919	8.38e-05	CD3G,IFNG,PRDM1,SLAMF6,TBX21,VCAM1
FOXP3		transcription regulator		-1.125	8.38e-05	IFNG,PRDM1,PTPN22,SMAD7,TBX21,TNFAIP3
CCL3L3		cytokine			8.45e-05	CCL4,CCL5,IFNG
APOE		transporter			8.98e-05	ABCA2,ACTA2,ADGRG1,CCL4,CCL5,F2R,IFNG,IL10RA,TXNIP,VCAM1
NFATC2	0.383	transcription regulator		1.311	8.99e-05	CCL5,CD3G,GBP4,IFNG,SLAMF6,SLFN12L,TBX21,TLR3
ABCG1		transporter		-1.982	9.22e-05	CCL4,IFNG,IL10RA,SLC2A1
BMP4		growth factor	Activated	2.028	9.3e-05	ACTA2,ADGRG1,CDKN2A,IFNG,ITGA4,KLF10,RUNX3,SMAD7
TCF7L2		transcription regulator	Activated	3.148	9.67e-05	ADGRG1,ARAP2,CDKN2A,IPO13,MYO6,NPC1,PPP1R16B,RALGDS,RAP2A,SMAD7
VIP		other		-0.381	9.8e-05	CCL4,CCL5,CLCF1,IFNG,KLRC4-KLRK1/KLRK1,NFATC2
FN1		enzyme	Activated	2.178	9.94e-05	ACTA2,CCL4,CCL5,CD8A,IFNG,IL7,ITGA4,SLC2A1
EOMES	0.858	transcription regulator		1.406	0.000103	ACTA2,EOMES,GZMA,IFNG,PRDM1,SATB2
TGFB2		growth factor		1.031	0.000103	ACTA2,BHLHE40,CDKN2A,IFNG,NFATC2,TGFBR3
CHUK		kinase		1.446	0.000106	CCL4,CCL5,GBP4,IFNG,KLF10,TLR3,TNFAIP3,VCAM1
FSH		complex		0.179	0.000106	ACTA2,ADGRG1,GATA6,GBP1,KLF10,PPP2R5C,RAP1GAP,SLC2A1,SMAD7,TGFBR3,TNFAIP3
SCAVENGER receptor CLASS A		group			0.000107	CCL5,IFNG,TBX21
TYR		enzyme			0.000107	CXCR3,IFNG,KLRD1
SPHK2		kinase			0.000107	CCL5,FYN,IFNG
C3		peptidase		0.971	0.000109	ACTA2,CCL4,CCL5,IFNG,SMAD7
CTLA4		transmembrane receptor		-0.259	0.000109	CBLB,IFNG,LAG3,NFATC2,PRDM1
let-7a-5p (and other miRNAs w/seed GAGGUAG)		mature microRNA	Inhibited	-2.564	0.000112	ACTA2,ADGRG1,CDKN2A,ITGA4,PRDM1,RDH10,TGFBR3
RNASE2		enzyme		1.945	0.000115	CCL4,CCL5,CXCL9,IL7
Jnk		group		1.791	0.000121	ACTA2,CCL4,CCL5,IFNG,ITGA4,OCLN,TRPC3,VCAM1
IL3		cytokine		1.941	0.000123	ABCA2,CD3G,CXCL9,F2R,GNAO1,GZMA,PTPN22,SLAMF7,SLC2A1,VCAM1
TLR7		transmembrane receptor	Activated	2.8	0.000125	CCL4,CCL5,CXCL9,IFNG,IL10RA,INPP5D,MCOLN2,TNFAIP3
KDM2B		enzyme			0.000128	CCL5,CDKN2A,EOMES,GATA6
IL1		group	Activated	2.771	0.000132	BHLHE40,CCL4,CCL5,CXCL9,IFNG,IL7,NFATC2,SLC2A1,TNFAIP3,VCAM1
TGFB3		growth factor		0.861	0.000132	ACTA2,BHLHE40,CDKN2A,OCLN,SMAD7,TGFBR3
PURA		transcription regulator			0.000133	ACTA2,ITGAD,ITGAL
AIMP1		cytokine			0.000133	CCL4,CCL5,IFNG
CYCS		transporter			0.000138	IFNG,PRDM1
TRAF3IP2		other	Activated	2.236	0.000142	CCL5,GFI1,IFNG,ITGAL,VCAM1
Calcineurin protein(s)		complex		1.446	0.000142	CBLB,CCL4,CCL5,NFATC2,RYR1
BTK		kinase		-1	0.000145	CCL4,CD2,CDKN2A,CXCL9,IFNG,IL10RA
IKBKB		kinase		1.193	0.000149	CBLB,CCL4,CCL5,FYN,IFNG,SMAD7,TLR3,TNFAIP3,VCAM1
SLAMF1		transmembrane receptor			0.000163	IFNG,SH2D1A,TBX21
IL5		cytokine	Activated	2.319	0.000165	ATXN1,CXCR3,GBP4,IFNG,IL2RG,ITGAD,PRDM1,RAP1GAP,SLC2A1
HGF		growth factor		-0.424	0.000168	ACTA2,ADGRG1,CCL4,CCL5,CDKN2A,CLCF1,IFNG,NPC1,OCLN,SLC20A1,TNFAIP3,VCAM1
ADIPOQ		other		-0.798	0.000169	CCL5,CDKN2A,CXCL9,IFNG,TNFAIP3,TNIP3,VCAM1
MAPK8		kinase		0.765	0.000182	CCL5,CDKN2A,EOMES,IFNG,SH2D2A,TBX21,TNFAIP3
Notch		group	Activated	2.2	0.000183	ACTA2,CDCA7,IFNG,RUNX3,TBX21
PRDM1	0.346	transcription regulator		0.244	0.000186	ADGRG1,IFNG,ITGA4,LAG3,MSC,PRDM1,TBX21,TIGIT
GATA1		transcription regulator		0.485	0.000192	ABCA2,CCL5,CDKN2A,CXCR3,HBG1,IFNG,IKZF3,RUNX3,SSBP3
APP		other	Activated	2.219	0.000193	ACTA2,ATP1A3,CCL4,CCL5,EOMES,FYN,GBP4,GNAO1,IFNG,ITGA4,ITGAL,OCLN,RNF213,SLAMF8,SMAD7,TLR3,VCAM1
TLR2		transmembrane receptor	Activated	2.228	0.000195	APOBEC3G,CCL4,CCL5,IFNG,ITGA4,MCOLN2,TBX21
CCL5	0.861	cytokine	Activated	2.186	0.000195	CCL4,CCL5,F2R,GFI1,IFNG
Fcgr3		group			0.000197	IFNG,ITGAL,TBX21
KLF10	0.651	transcription regulator			0.000197	ITGAD,SMAD7,TBX21
PPP2R5C	0.276	other			0.000197	IFNG,TNFAIP3,TNIP3
S1PR2		G-protein coupled receptor			0.000197	ACTA2,CCL5,VCAM1
CBFB		transcription regulator	Inhibited	-2	0.000207	IKZF3,ITGAL,RUNX3,TBX21,TGFBR3
SELPLG		other		0.762	0.000208	CCL4,IFNG,LAG3,SERPINB9
FOXO1		transcription regulator		0.536	0.000218	CCL4,CDKN2A,EOMES,FYN,GZMA,IFNG,NPC1,PRDM1,TBX21,TXNIP,VCAM1
JUND		transcription regulator			0.000219	CCL5,CDKN2A,IFNG,SERPINB9,TBX21
IRAK1		kinase		0.919	0.000228	CCL5,IFNG,NFATC2,VCAM1
IFN alpha/beta		group	Activated	2.156	0.000233	CCL5,IFNG,IL7,SERPINB9,TLR3
NR3C1		ligand-dependent nuclear receptor		-0.374	0.000234	ATXN1,BHLHE40,CCL4,CCL5,CLCF1,F2R,GZMA,OCLN,PIK3R3,SERPINB9,STOM,TCF19,TNFAIP3,VCAM1
IFNW1		cytokine			0.000235	CXCL9,IFNG,TLR3
PAEP		other			0.000235	CCL5,CXCR3,IFNG
EZH2		transcription regulator		-1.969	0.000243	CCL5,CDKN2A,CXCR3,EOMES,IFNG,IL10RA,PPP2R2B,PRDM1,RAP1GAP,TBX21
SMAD4		transcription regulator		0.488	0.000248	CDKN2A,CYB561,IFNG,INPP5D,LPAR1,RUNX3,SMAD7,TBX21
TRAF2		enzyme		1.205	0.000261	CCL5,CDKN2A,IFNG,TNFAIP3,WEE1
RUNX1		transcription regulator	Activated	2.219	0.000266	ADGRG1,CDKN2A,CST7,CYB561,IFNG,ITGA4,ITGAL
IL33		cytokine	Activated	2.641	0.00027	ATXN1,CCL4,CCL5,IFNG,IL2RG,RAPGEF1,RASGRP1,TNFAIP3
IFNA4		cytokine			0.000271	ATP2B4,CXCL9,GBP5,IFNG
Il12 receptor		complex			0.000275	IFNG,TBX21
CRTAM	0.742	other			0.000275	EOMES,IFNG
ARID5B		transcription regulator			0.000275	ACTA2,IFNG
TPP2		peptidase			0.000275	IFNG,TBX21
HMGB1		transcription regulator		1.212	0.000276	CCL4,CDKN2A,IFNG,SMAD7,VCAM1
MAPK8IP1		other			0.000278	EOMES,IFNG,TBX21
MNT		transcription regulator			0.000278	IFNG,KLF10,TXNIP
IFNL1		cytokine		1.982	0.000291	APOL6,CXCL9,F2R,GBP1,IFNG
IL6		cytokine		0.751	0.000298	CCL4,CCL5,CDKN2A,CXCR3,EOMES,IFNG,IL7,KLRD1,LAG3,SMAD7,STOM,TBX21,TLR3,VCAM1,WEE1
LYN		kinase		-1.953	0.000308	CCL4,CCL5,CDKN2A,FYN,IFNG
EBF1		transcription regulator		1.408	0.000318	CBLB,CCL5,INPP5D,PIK3R3,PRDM1,TLR3
mir-181		microRNA		-1.103	0.00032	CDKN2A,GATA6,PTPN22,SMAD7
ATXN1	0.287	transcription regulator			0.000325	ATXN1,GFI1,TRPC3
CCL2		cytokine		1.677	0.000325	ACTA2,CCL5,IFNG,ITGAL,VCAM1
LMNA		other			0.000335	ACTA2,ARRDC4,GATA6,MSC,NPC1,RAPGEF1,SOX13,ZBTB38
MYOD1		transcription regulator		1.741	0.000344	ACTA2,FYN,MSC,RYR1,SLC2A1,SMAD7,TGFBR3
CD86		transmembrane receptor		1.999	0.000346	CCL4,GZMA,IFNG,TNFAIP3
IKZF1		transcription regulator		-1.414	0.000353	CCL4,CD8A,IFNG,RNF213,RYR1,SLC2A1,TBX21,TXNIP
AGT		growth factor	Activated	2.085	0.000356	ACTA2,CCL4,CCL5,CDKN2A,IFNG,NCALD,OCLN,SLC2A1,SMAD7,TXNIP,VCAM1
SOCS1		other	Inhibited	-2.2	0.000372	CXCR3,GBP5,IFNG,RALGDS,TLR3,VCAM1
SMARCA4		transcription regulator	Activated	2.333	0.000384	ACTA2,ADGRG1,APOBEC3G,ARRDC4,ATP2B4,CDKN2A,CLCF1,CXCR3,GBP1,HBG1,IFNG,NCALD,TBX21
SOX2		transcription regulator		0.81	0.000426	BHLHE40,CDKN2A,EOMES,FYN,GATA6,GBP4,HOXC4,LPAR1,PIK3R3,PRDM1,SOX13
MRTFB		transcription regulator			0.000434	ACTA2,CCL5,F2R,GFI1,NUAK1,SLC20A1
RAG1		enzyme			0.000435	CD2,IFNG,TLR3
NRAS		enzyme			0.00044	CCL4,CCL5,CDKN2A,IFNG,KLRD1,SLC2A1,WEE1
TGFBR2		kinase		0.243	0.000454	ACTA2,BHLHE40,CDKN2A,IFNG,SMAD7,TBX21,TXNIP
LAMP1		other			0.000455	IFNG,TBX21
SMARCC2		transcription regulator			0.000455	IFNG,TBX21
CTNNB1		transcription regulator	Activated	2.18	0.000466	ACTA2,BHLHE40,CDKN2A,EOMES,F2R,GNAO1,IFNG,IL7,ITGA4,ITGAL,PRDM1,SMAD7,SYNM,TBX21,VCAM1
CD3 group		group			0.000469	CBLB,FYN,IFNG,TBX21
IGF1		growth factor		1.021	0.000473	ACTA2,BHLHE40,CCL4,CCL5,CDKN2A,OCLN,SLC20A1,SLC2A1,TXNIP,VCAM1,WEE1
CAV1		transmembrane receptor		0.152	0.000485	CDKN2A,IFNG,OCLN,RPS9,SLC20A1,VCAM1
SMAD2		transcription regulator		1.004	0.000487	ACTA2,CDKN2A,IFNG,INPP5D,SMAD7
IL17a dimer		complex			0.000498	CCL4,CCL5,IFNG
IFNK		cytokine			0.000498	CXCL9,IFNG,TLR3
mir-9		microRNA			0.000498	CDKN2A,PRDM1,RAP2A
MOG		other			0.00054	CCL5,IFNG,ITGAL,VCAM1
BACH2		transcription regulator			0.00054	CDKN2A,IFNG,PRDM1,TBX21
mir-24		microRNA		1.964	0.00054	CXCR3,IFNG,PRDM1,TBX21
Ccl2		cytokine		1.96	0.00054	CCL4,CCL5,IFNG,VCAM1
HRAS		enzyme	Activated	2.2	0.000553	ATP1A3,ATXN1,CCL5,CDKN2A,CLCF1,CXCR3,F2R,IFNG,ITGA4,PRSS23,RAP1GAP,RASGRP1,SERPINB9
CD81		other			0.000566	IFNG,SMAD7,VCAM1
MAP3K3		kinase			0.000566	IFNG,TGFBR3,TNFAIP3
GNL3		other			0.000566	CDKN2A,EOMES,GATA6
ANGPT2		growth factor		0.896	0.000573	ACTA2,CCL5,GATA6,RDH10,TLR3,TXNIP,VCAM1
EBI3		cytokine		1.957	0.000579	EOMES,IFNG,LAG3,TBX21
BCL6		transcription regulator			0.000642	CCL4,CD2,CDKN2A,IFNG,PRDM1,PRSS23,TBX21
Nr1h		group	Inhibited	-2.168	0.000643	CCL5,F2R,ITGAL,NPC1,RUNX3,SLFN12L
Stat1 dimer		complex			0.00068	IFNG,TBX21
miR-193a-5p (miRNAs w/seed GGGUCUU)		mature microRNA			0.00068	IL2RG,PIK3R3
GNAZ		enzyme			0.00068	CCL4,IFNG
HIF1A		transcription regulator		1.848	0.000702	ACTA2,BHLHE40,CCL5,CDKN2A,FYN,GATA6,IFNG,SLC2A1,SMAD7,VCAM1
IFNL3		cytokine			0.00072	IFNG,IFNLR1,TLR3
TNFSF4		cytokine			0.00072	IFNG,PRDM1,TBX21
CXCL10		cytokine			0.00072	CCL5,CXCR3,IFNG
MTA2		transcription regulator			0.00072	CDKN2A,HBG1,IFNG
IRAK3		kinase			0.00072	ACTA2,INPP5D,TNFAIP3
Vegf		group	Activated	2.143	0.000731	ACTA2,ADGRG1,CDKN2A,CLCF1,IFNG,LPAR1,NPC1,RGS9,SLC20A1,TLR3,VCAM1
FLI1		transcription regulator		1.172	0.000801	ADGRG1,CCL5,CXCR3,INPP5D
TNFRSF8		transmembrane receptor		0	0.000801	CCL4,GBP1,IFNG,NKG7
TICAM2		other			0.000805	CCL4,CCL5,IFNG
CARD11		kinase			0.000805	CCL4,CCL5,IFNG
Ap1		complex	Activated	2.186	0.00084	CCL4,CCL5,CDKN2A,IFNG,PRDM1,VCAM1
CD38		enzyme		1.698	0.00084	ACTA2,GBP4,PRDM1,RAP1GAP,SLC2A1,VCAM1
SIN3A		transcription regulator			0.000851	IFNG,KLF10,SMAD7,TXNIP
TYROBP		transmembrane receptor			0.000851	CD84,IFNG,IL10RA,KLRD1
TP63		transcription regulator		1.092	0.000852	BHLHE40,CDKN2A,F2R,GFI1,HOXC4,ITGA4,PIK3R3,RACGAP1,RAP2A,WEE1
EP300		transcription regulator			0.000867	CDKN2A,CST7,GFI1,IL10RA,SH2D1A,SLAMF6,SMAD7,STOM,TNFAIP3,TXNIP
NR1H3		ligand-dependent nuclear receptor		0.557	0.000887	ABCA2,ACTA2,CCL4,CCL5,GBP4,ITGAL,LAG3
MRTFA		transcription regulator			0.000896	ACTA2,CCL5,CDKN2A,F2R,GFI1,SLC20A1
NCF1		enzyme			0.000898	ACTA2,CCL5,IFNG
RC3H1		enzyme			0.000898	CCL4,CCL5,IFNG
IL25		cytokine		1.732	0.000904	CCL5,GFI1,IFNG,OCLN
CG		complex		1.648	0.00092	ACTA2,BHLHE40,FYN,GATA6,IFNG,ITGA4,SLC20A1,SLC4A4,TGFBR3
TGM2		enzyme		1.633	0.000934	CDCA7,IFNG,IL10RA,PPP1R16B,RNF213,SLAMF7,SLC20A1
ARID5A		transcription regulator			0.000948	IFNG,TBX21
MRC1		transmembrane receptor			0.000948	CCL5,IFNG
CLEC2A		other			0.000948	CCL4,CCL5
PDCD1		phosphatase		-1.039	0.00096	CBLB,CST7,GZMA,IFNG
B2M		transmembrane receptor			0.000996	CD8A,CD8B,IFNG
FCGR2A		transmembrane receptor			0.000996	CCL4,CCL5,IFNG
PI3K (family)		group		1.026	0.00103	ACTA2,CXCL9,RDH10,SLC2A1,TXNIP
DICER1		enzyme		-1.378	0.00103	APOBEC3G,CDKN2A,EOMES,IFNG,ITGA4,RASGRP1,SLC4A4,TRPC3
CD3E		transmembrane receptor			0.00108	CBLB,CD3G,CD8B,IFNG
MAF		transcription regulator			0.00114	IFNG,NUAK1,PRDM1,VCAM1
IRF7		transcription regulator	Activated	2.386	0.00115	APOBEC3G,CCL5,CXCL9,GBP1,GBP4,GBP5
DUSP1		phosphatase		0.152	0.00116	APOL6,CCL4,PRDM1,SH2D2A,VCAM1
TNFSF14		cytokine			0.00121	CCL5,IFNG,VCAM1
HTT		transcription regulator			0.00122	ACTA2,ATP1A3,BHLHE40,CCL5,DLG3,GNAO1,HOXB9,PPP1R16B,PTPN22,RAP1GAP,RGS9,SLC2A1,VCAM1
KDM1A		enzyme		-1.109	0.00125	CCL5,CXCL9,EOMES,IKZF3,SMAD7,TCF19
PPT1		enzyme			0.00126	CCL4,IFNG
HRH3		G-protein coupled receptor			0.00126	CXCR3,IFNG
LITAF		transcription regulator			0.00126	CCL5,IFNG
immune complex		complex			0.00126	IFNG,VCAM1
CD8A	1.155	other			0.00126	CD8B,IFNG
SDC2		other			0.00126	ACTA2,TGFBR3
MLANA		other			0.00126	IFNG,KLRD1
RBCK1		transcription regulator			0.00126	TNFAIP3,VCAM1
ULBP1		transmembrane receptor			0.00126	CCL4,IFNG
TLR4		transmembrane receptor	Activated	2.571	0.00126	CCL4,CCL5,IFNG,MCOLN2,PRDM1,SLFN12L,TLR3,TNFAIP3,VCAM1
DNMT3B		enzyme		-0.447	0.00129	CCL5,CDKN2A,NFATC2,SERPINB9,SH2D1A,TRPC3
mir-155		microRNA		-1.195	0.0013	CCL5,IFNG,IL7,INPP5D,WEE1
TRB		transmembrane receptor			0.00133	CD8A,CXCR3,IFNG
CSF3		cytokine		-1.285	0.00133	CCL5,GFI1,IFNG,IL7,TNFAIP3,VCAM1
IL1A		cytokine	Activated	2.399	0.00135	CCL4,CCL5,CLEC2D,GBP1,IFNG,TNFAIP3,VCAM1
GATA2		transcription regulator		0.378	0.00138	ADGRG1,CCL5,CST7,GFI1,GZMA,NKG7,TGFBR3,UBXN10,VCAM1
HOXA9		transcription regulator		-0.625	0.00141	ADGRG1,CDKN2A,GFI1,HBG1,PPP1R16B,SERPINB9
Ifn		group		1.982	0.00145	CXCR3,IL10RA,IL7,ITGA4,TLR3
HLX		transcription regulator			0.00146	CDKN2A,IFNG,PRDM1
ARHGAP31		other			0.00146	CDKN2A,OCLN,TGFBR3
PARP1		enzyme	Activated	2.219	0.00151	CCL5,GBP4,IFNG,ITGAL,VCAM1
ATG7		enzyme		-1.103	0.00157	ACTA2,CCL4,IFNG,SLC2A1
mir-150		microRNA			0.00159	ACTA2,IFNG,SLC2A1
FBXO42		other			0.00161	CCL5,VCAM1
tryptase		group			0.00161	F2R,TNFAIP3
PI3		other			0.00161	ACTA2,IFNG
SPN		transmembrane receptor			0.00161	IFNG,IL2RG
CD48		other			0.00161	IFNG,SERPINB9
IL12RB2		transmembrane receptor			0.00161	IFNG,VCAM1
RNF31		enzyme	Inhibited	-2	0.00165	CCL4,CCL5,IL10RA,IL2RG
PRKCQ		kinase			0.00173	IFNG,ITGAL,TBX21
PIK3CD		kinase			0.00173	CCL4,IFNG,PRDM1
IRF1		transcription regulator	Activated	2.415	0.00176	APOL6,CCL5,IFNG,IL7,TLR3,VCAM1
SOX4		transcription regulator		0.555	0.00176	CD2,EFNA5,EOMES,GFI1,GPR171,NUAK1
IRF2		transcription regulator		0.714	0.0018	GBP1,IFNG,IL7,TLR3,VCAM1
IFI16		transcription regulator		1.964	0.00182	CCL4,CCL5,CDKN2A,VCAM1
SOD1		enzyme			0.00183	ATP1A3,CYB561,IFNG,MINK1,OCLN,TNFAIP3,VCAM1
SP1		transcription regulator	Activated	2.191	0.00184	ACTA2,CCL5,CDKN2A,F2R,FYN,IFNG,ITGAD,SLC2A1,SMAD7,TGFBR3,TNFAIP3
IGFBP3		other			0.00188	CCL4,CCL5,VCAM1
PCGF2		transcription regulator			0.00188	CDKN2A,HOXB9,IFNG
PF4		cytokine			0.00188	ACTA2,CCL4,IFNG
Stat1-Stat2		complex			0.002	IFNG,TLR3
ANG		enzyme			0.002	CCL5,CXCL9
FOXN1		transcription regulator			0.002	GZMA,PPP1R16B
ITGA4	0.525	transmembrane receptor			0.002	ITGA4,TNFAIP3
HLA-G		other			0.002	CD8A,IFNG
PDE4B		enzyme			0.002	CCL5,IFNG
PIM3		kinase			0.002	IFNG,TBX21
SLC6A1		transporter			0.002	IFNG,TBX21
PPARG		ligand-dependent nuclear receptor		-1.098	0.002	ACTA2,CCL5,IFNG,ITGAD,OCLN,PPP2R2B,PRDM1,RAPGEF1,SLC2A1,VCAM1
SERPINE1		other			0.00204	ACTA2,CDKN2A,IFNG
CD80		transmembrane receptor			0.00204	CBLB,IFNG,TBX21
IL27RA		transmembrane receptor			0.00204	IFNG,PRDM1,TBX21
EGFR		kinase		0.3	0.00208	ACTA2,CCL5,CDKN2A,F2R,GBP1,IFNG,SLC2A1,TXNIP,WEE1
mir-29		microRNA		-1.982	0.0021	ACTA2,EOMES,TBX21,TNFAIP3
NQO1		enzyme			0.0022	CCL5,CXCR3,VCAM1
SPRY2		other			0.0022	EOMES,OCLN,SLC2A1
WNT3A		cytokine		-0.785	0.00222	ACTA2,ARRDC4,EOMES,NCALD,PRDM1,TXNIP,VCAM1
PRC2		complex			0.00237	CDKN2A,GATA6,PPP2R2B
SERPINE2		other			0.00237	CCL4,CCL5,IFNG
JAG2		growth factor			0.00237	CCL5,CXCL9,IL10RA
GNB1		enzyme			0.00237	CCL4,F2R,PRDM1
NEDD9		other			0.00237	BHLHE40,SLC2A1,TXNIP
SYVN1		transporter	Activated	2.236	0.00242	BHLHE40,CYB561,SLC20A1,SLC2A1,STOM
Traj18		other			0.00244	CCL5,IFNG
WWP2		enzyme			0.00244	CCL5,SMAD7
AIMP2		other			0.00244	CDKN2A,SLC2A1
TNNI3		transporter			0.00244	CCL4,CCL5
VLDLR		transporter			0.00244	SLC2A1,TNFAIP3
KLF4		transcription regulator		0.758	0.00247	ACTA2,EOMES,GBP4,ITGAD,PRDM1,SMAD7,VCAM1
NR4A1		ligand-dependent nuclear receptor	Inhibited	-2.02	0.00252	ACTA2,CCL5,CST7,IFNG,OCLN,SMAD7,VCAM1
CEBPB		transcription regulator		1.71	0.00256	ACTA2,CCL4,CCL5,DMWD,IFNG,IL7,ITGAL,NFATC2,PRDM1
COMMD3-BMI1		transcription regulator			0.00274	CDKN2A,HOXB9,HOXC4
ALKBH5		enzyme			0.00274	FYN,MAST2,MYO6,RACGAP1
IRF8		transcription regulator		1.095	0.00275	CCL5,GBP1,IFNG,PRDM1,TLR3
NPC1	0.39	transporter			0.00286	CD8A,CDYL2,NPC1,OSBPL3
MAFB		transcription regulator			0.00286	CCL4,CXCL9,NUAK1,PRDM1
FEV		transcription regulator	Activated	2	0.00286	EFNA5,LPAR1,NCALD,VCAM1
TCIRG1		enzyme			0.00291	IFNG,ITGAL
PELI1		enzyme			0.00291	CCL5,IFNG
RB1CC1		other			0.00291	CCL5,SMAD7
TIGIT	0.628	other			0.00291	IFNG,TBX21
EP400		other			0.00293	CDKN2A,IFNG,TBX21
CD2	0.457	transmembrane receptor			0.00293	CD8A,IFNG,ITGAL
S100A4		other			0.00293	CCL5,OCLN,VCAM1
CCR5		G-protein coupled receptor			0.00293	CCL4,CCL5,IFNG
IL7R		transmembrane receptor			0.00298	IFNG,IL7,SLAMF6,VCAM1
TCF4		transcription regulator	Activated	2.219	0.003	CD2,CDKN2A,HOXB9,PRDM1,RACGAP1,SLAMF7
TGFBR1		kinase	Activated	2	0.0031	ACTA2,BHLHE40,NFATC2,SMAD7
Hsp90		group		1.987	0.0031	CD2,IFNG,ITGAL,KLRD1
EED		transcription regulator			0.00314	CDKN2A,GATA6,PPP2R2B
TNC		other			0.00335	CCL4,CD8A,IFNG
IFNLR1	0.449	transmembrane receptor			0.00335	CCL4,CCL5,TNFAIP3
RHOA		enzyme		0.068	0.00337	ACTA2,CDKN2A,OCLN,VCAM1
HNRNPA2B1		other			0.00339	IFNG,LPAR1,RYR1,STOM,UBXN10
IgG2a		complex			0.00343	IFNG,PRDM1
HLA-A		other			0.00343	IFNG,LAG3
LAMA2		other			0.00343	ACTA2,OCLN
Histone h4		group			0.00349	CCL4,CCL5,CDKN2A,RASGRP1,VCAM1
RBPJ		transcription regulator			0.00349	CDCA7,CDKN2A,PRDM1,RUNX3,SLC2A1
TRAF3		enzyme		1.877	0.0035	CCL5,IFNG,TBX21,TNFAIP3
SAMSN1		other		1	0.0035	CCL4,IFNG,SLFN12L,TLR3
PPP2CA		phosphatase			0.00357	GZMA,ITGAL,SLAMF8
IFNGR1		transmembrane receptor			0.00357	CCL5,IFNG,TBX21
GPX1		enzyme			0.00357	ACTA2,CCL4,VCAM1
CITED2		transcription regulator			0.00357	CDKN2A,GATA6,TNFAIP3
RAF1		kinase	Activated	2.2	0.00379	AP2B1,CDKN2A,OCLN,PRDM1,SH2D1A,TXNIP
Hbb-b1		transporter		0.655	0.00379	CXCR3,IL10RA,IL2RG,VCAM1
IL23		complex			0.0038	IFNG,TBX21,TLR3
SMAD1		transcription regulator			0.0038	ACTA2,SMAD7,VCAM1
EGR3		transcription regulator			0.0038	BHLHE40,CBLB,IFNG
IFNAR2		transmembrane receptor			0.0038	GBP4,KLRC4-KLRK1/KLRK1,TLR3
IL12A		cytokine			0.0038	CCL5,IFNG,VCAM1
Hbb-b2		other			0.0038	CXCR3,IL10RA,IL2RG
ICOS		transmembrane receptor			0.0038	EOMES,IFNG,TBX21
CEBPA		transcription regulator		0	0.00385	CCL4,CD3G,GATA6,GBP1,IKZF3,ITGAL,NFATC2,PRDM1,RUNX3
NKX2-3		transcription regulator		-0.709	0.00387	ACTA2,APOBEC3G,GBP1,RNF213,SMAD7,VCAM1
PDLIM2		other		-1	0.00393	IFNG,IL7,SERF1A/SERF1B,TXNIP
AKT1		kinase		1.488	0.00396	ACTA2,CCL4,CCL5,IFNG,NFATC2,SLC2A1,TGFBR3
IFNA10		cytokine			0.00398	CXCL9,IFNG
IFNA21		cytokine			0.00398	CXCL9,IFNG
ORAI1		ion channel			0.00398	IFNG,TBX21
IFNA5		cytokine			0.00398	CXCL9,IFNG
IFNA17		cytokine			0.00398	CXCL9,IFNG
PSMB10		peptidase			0.00398	TBX21,TNFAIP3
IFNA7		cytokine			0.00398	CXCL9,IFNG
TAC4		other			0.00398	IFNG,PRDM1
mir-322		microRNA			0.00398	CDKN2A,SMAD7
IFNA14		cytokine			0.00398	CXCL9,IFNG
IFNA6		cytokine			0.00398	CXCL9,IFNG
Tnfsf9		other			0.00398	IFNG,VCAM1
VCP		enzyme			0.00398	CCL5,VCAM1
ADAM15		peptidase			0.00398	CCL5,IFNG
HAVCR1		other			0.00398	IFNG,TBX21
C3AR1		G-protein coupled receptor			0.00404	CCL4,CCL5,IFNG
PI3K (complex)		complex		1.217	0.00419	CCL4,CD2,IFNG,PRDM1,TNFAIP3,TXNIP,VCAM1
SOX11		transcription regulator		-0.068	0.00424	CCL5,IKZF3,ITGA4,PRDM1
APLN		other			0.00429	GFI1,HBG1,IFNG
SCARB1		transporter			0.00455	CCL5,IFNG,VCAM1
TBK1		kinase			0.00456	CCL4,CCL5,IFNG,TLR3
LGALS3		other		0.94	0.00456	IFNG,NFATC2,PRDM1,VCAM1
C1q		complex			0.00457	IFNG,VCAM1
TIFA		other			0.00457	CCL5,TNFAIP3
miR-128-3p (and other miRNAs w/seed CACAGUG)		mature microRNA			0.00457	TXNIP,WEE1
TBX3		transcription regulator			0.00457	CDKN2A,GATA6
CD209		other			0.00457	CCL4,OCLN
CBX8		other			0.00457	CDKN2A,PRDM1
IFNA8		cytokine			0.00457	CXCL9,IFNG
TNFSF9		cytokine			0.00457	IFNG,VCAM1
IFNA16		cytokine			0.00457	CXCL9,IFNG
NLRX1		other			0.00481	IFNG,SLC2A1,TNFAIP3
PNPT1		enzyme			0.00481	CCL5,GBP4,RNF213
TNFRSF1A		transmembrane receptor		0.612	0.00485	CCL4,CCL5,IFNG,TBX21,VCAM1
CYP1A1		enzyme			0.0049	HOXB9,IFNLR1,RACGAP1,WEE1
Mek		group		1.945	0.00491	CDCA7,CDKN2A,CXCL9,IFNG,SLC20A1,TNFAIP3
MYC		transcription regulator		1.922	0.00506	ABCA2,CDCA7,CDKN2A,CXCL9,EOMES,F2R,GATA6,GBP4,ITGAL,KLF10,MAP4K1,PRDM1,RPS9,SLC2A1,TXNIP,VCAM1
MKNK1		kinase	Activated	2	0.00508	ATP1A3,GNAO1,MYO6,TXNIP
FHL2		transcription regulator			0.00509	ACTA2,IFNG,OCLN
BMP10		growth factor			0.0052	SMAD7,VCAM1
CXCL2		cytokine			0.0052	CCL4,CCL5
PIM2		kinase			0.0052	IFNG,TBX21
VIPR1		G-protein coupled receptor			0.0052	CCL4,CCL5
SMURF2		enzyme			0.0052	CDKN2A,SMAD7
CNR2		G-protein coupled receptor			0.0052	IFNG,ITGAL
S1PR3		G-protein coupled receptor			0.0052	ACTA2,VCAM1
Cux1		transcription regulator			0.0052	CCL5,CD8A
FOS		transcription regulator		1.741	0.0052	CASZ1,CCL5,IFNG,PRDM1,RAP1GAP,RPS9,SERPINB9,SMAD7,VCAM1,WEE1
miR-155-5p (miRNAs w/seed UAAUGCU)		mature microRNA	Inhibited	-2.189	0.00538	CCL4,IFNG,INPP5D,SYNE2,WEE1
F2R	0.83	G-protein coupled receptor		1.718	0.00544	F2R,TNFAIP3,TRPC3,VCAM1
SIRT3		enzyme			0.00567	ACTA2,IFNG,SLC2A1
MSTN		growth factor			0.00567	ACTA2,KLF10,SLC2A1
CD5		transmembrane receptor			0.00567	CCL4,IL2RG,RUNX3
ADCYAP1		other		0.148	0.00567	CCL4,CCL5,CLCF1,DDHD1,NFATC2,SLC2A1
SATB1		transcription regulator		0.44	0.0058	CD8A,HBG1,IL10RA,IL7,LAG3
PTGER2		G-protein coupled receptor	Activated	2	0.00582	IFNG,ITGAL,KLRD1,RACGAP1
INHA		growth factor		-1.091	0.00582	ACTA2,IFNG,PRSS23,SMAD7
Sod		group			0.00587	CCL4,VCAM1
IL-17f dimer		complex			0.00587	CCL4,CCL5
TNFRSF6B		transmembrane receptor			0.00587	IFNG,VCAM1
CD70		cytokine			0.00587	IFNG,PRDM1
DDR1		kinase			0.00587	CDKN2A,VCAM1
SMPD1		enzyme			0.00587	ACTA2,CCL5
REL		transcription regulator	Activated	2.177	0.00591	ATXN1,CCL4,IFNG,RAP2A,RDH10,TNFAIP3
LPL		enzyme			0.00597	GBP1,SLC2A1,VCAM1
RGS10		other			0.00597	CXCR3,IFNG,IL10RA
GLI2		transcription regulator			0.00622	CCL4,CCL5,CXCR3,IFNG
ERBB2		kinase		1.947	0.00624	ACTA2,BHLHE40,CCL4,CCL5,CDCA7,CDKN2A,CYB561,F2R,IFNG,PPP2R2B,SLC2A1,SMAD7
TMEM173		other			0.00629	CCL5,GBP5,KLRD1
PIM1		kinase			0.00629	CDKN2A,IFNG,TBX21
LYL1		transcription regulator			0.00658	ADGRG1,RAPGEF1
DEF6		other			0.00658	IFNG,PRDM1
CD46		other			0.00658	IFNG,SLC2A1
ITGAL	0.301	transmembrane receptor			0.00658	ITGA4,ITGAL
CXCL3		cytokine			0.00658	CCL4,CCL5
EGLN3		enzyme			0.00658	OCLN,VCAM1
KLRC4-KLRK1/KLRK1	0.89	transmembrane receptor			0.00658	IFNG,KLRC4-KLRK1/KLRK1
NCR2		transmembrane receptor			0.00658	CCL4,IFNG
BDNF		growth factor		1.342	0.00658	ATP1A3,BHLHE40,GNAO1,KLF10,MYO6,TRPC3,TXNIP
CYP1B1		enzyme			0.00661	GZMA,IFNLR1,WEE1
IFNA1/IFNA13		cytokine			0.00661	CXCL9,IFNG,TLR3
SIRT1		transcription regulator	Inhibited	-2.76	0.00662	CCL5,CDKN2A,IFNG,IL2RG,NKG7,NLRC5,RNF213,SSBP3
MRGPRX2		G-protein coupled receptor			0.00682	CCL4
TRIM72		enzyme			0.00682	ACTA2
CALHM6		other			0.00682	IFNG
ATP synthase		complex			0.00682	IFNG
IL12R		group			0.00682	IFNG
USP20		peptidase			0.00682	VCAM1
TOX2		transcription regulator			0.00682	TBX21
RDH5		enzyme			0.00682	RDH10
KY		other			0.00682	IFNG
Ifngas1		other			0.00682	IFNG
DEPDC1		transcription regulator			0.00682	TNFAIP3
PGLYRP4		transmembrane receptor			0.00682	IFNG
NBR2		other			0.00682	SLC2A1
RAET1G		other			0.00682	KLRC4-KLRK1/KLRK1
Klre1		transmembrane receptor			0.00682	IFNG
RIF1		other			0.00682	PRDM1
TCFL5		transcription regulator			0.00682	CD2
RGS9BP		other			0.00682	RGS9
1010001N08Rik		other			0.00682	GATA6
MSN		other			0.00682	CDKN2A
MYLPF		other			0.00682	ACTA2
ITSN2		other			0.00682	CDKN2A
CD96		other			0.00682	IFNG
MED7		transcription regulator			0.00682	TNFAIP3
ADAMTS9-AS2		other			0.00682	TGFBR3
TSTA3		enzyme			0.00682	ACTA2
PRPF4		other			0.00682	CCL5
miR-125a-3p (miRNAs w/seed CAGGUGA)		mature microRNA			0.00682	FYN
miR-1225-3p (miRNAs w/seed GAGCCCC)		mature microRNA			0.00682	GAB3
mir-1225		microRNA			0.00682	GAB3
DOK3		other			0.00682	NFATC2
ZBTB48		transcription regulator			0.00682	CDKN2A
ITIH5		other			0.00682	ACTA2
AMHR2		kinase			0.00682	CDKN2A
SH2D1B		other			0.00682	IFNG
TONSL		transcription regulator			0.00682	CCL5
HLA-DPB1		transmembrane receptor			0.00682	IFNG
GAD2		enzyme			0.00682	IFNG
RASGRP2		other			0.00682	RAP2A
MICA		other			0.00682	KLRC4-KLRK1/KLRK1
MED21		transcription regulator			0.00682	TNFAIP3
H2-K2/H2-Q9		other			0.00682	IFNG
SLC7A8		transporter			0.00682	IFNG
STK35		kinase			0.00682	CDKN2A
M6PR		transporter			0.00682	NPC1
RXFP1		G-protein coupled receptor			0.00682	ACTA2
TRIP12		enzyme			0.00682	CDKN2A
PEX19		other			0.00682	CDKN2A
EVL		other			0.00682	ITGA4
HLA-DPA1		transmembrane receptor			0.00682	IFNG
CXCR6		G-protein coupled receptor			0.00682	IFNG
Polycomb		complex			0.00682	CDKN2A
CLEC4G		other			0.00694	IFNG,RUNX3,TBX21
PAX5		transcription regulator			0.00694	PRDM1,SLC2A1,TXNIP
PTK2		kinase			0.00729	ACTA2,OCLN,VCAM1
CBX7		other			0.00732	CDKN2A,PRDM1
CTBP2		transcription regulator			0.00732	EOMES,OCLN
S1PR1		G-protein coupled receptor			0.00732	IFNG,VCAM1
MST1R		kinase			0.00732	ACTA2,IFNG
FOXO3		transcription regulator		-1	0.00748	ACTA2,FYN,IFNG,MYO6,PRDM1,TXNIP,VCAM1
CCR2		G-protein coupled receptor		1.7	0.00752	CCL4,CCL5,IFNG,ITGAL
1810019D21Rik		other			0.00764	APOL6,STYK1,SYNE1
HSP90B1		other			0.00764	IFNG,ITGA4,ITGAL
AIRE		transcription regulator			0.008	CCL5,IFNG,TLR3
STAT2		transcription regulator			0.008	CCL5,GBP1,IFNG
RNF2		transcription regulator			0.008	CDKN2A,EOMES,GATA6
CHD4		enzyme			0.008	CLCF1,HBG1,TBX21
SRC		kinase		1.941	0.008	F2R,GBP1,SLC2A1,VCAM1
FGF2		growth factor		-0.426	0.00805	ACTA2,GBP1,ITGA4,SLC20A1,SLC2A1,STOM,TGFBR3,VCAM1
ERVW-1		other			0.00809	CCL5,CDKN2A
ZNF202		transcription regulator			0.00809	CDKN2A,LAG3
MLX		transcription regulator			0.00809	ARRDC4,TXNIP
KCNIP3		transcription regulator			0.00809	IFNG,TNFAIP3
TLR1		transmembrane receptor			0.00809	IFNG,TNFAIP3
IL11RA		transmembrane receptor			0.00809	ACTA2,CCL4
TCF3		transcription regulator		1.4	0.00835	CD2,CD8B,CDKN2A,GFI1,PRDM1,RACGAP1,SLAMF7
IL1R1		transmembrane receptor			0.00837	ACTA2,CCL5,IFNG
miR-21-5p (and other miRNAs w/seed AGCUUAU)		mature microRNA			0.00837	ACTA2,IFNG,SMAD7
CUX1		transcription regulator			0.00837	CCL5,OCLN,RACGAP1
OGA		enzyme		-1.134	0.00838	APOBEC3G,CDCA7,CXCR3,RAP2A,SERPINB9,SLFN12L,TCF19,TGFBR3
Tlr		group		1.925	0.00848	CCL4,CCL5,IFNG,TNFAIP3
EGLN1		enzyme			0.00876	IFNG,SLC2A1,VCAM1
CLOCK		transcription regulator			0.00879	BHLHE40,F2R,GNAO1,RAP2A,SLC20A1,WEE1
DNA-methyltransferase		group			0.00891	CDKN2A,IFNG
Lymphotoxin		complex			0.00891	CCL5,VCAM1
XRCC6		enzyme			0.00891	CCL5,IFNG
miR-31-5p (and other miRNAs w/seed GGCAAGA)		mature microRNA			0.00891	CDKN2A,SATB2
ITGA9		other			0.00891	ACTA2,CCL4
GNAI3		enzyme			0.00891	CCL4,CCL5
ACKR1		G-protein coupled receptor			0.00891	TNFAIP3,VCAM1
SIN3B		transcription regulator			0.00891	KLF10,TXNIP
ADORA3		G-protein coupled receptor			0.00891	CCL4,CCL5
IL37		cytokine			0.00891	CCL4,IFNG
CD200		other			0.00975	IFNG,ITGAL
IL2RA		transmembrane receptor			0.00975	GZMA,IFNG
PYCARD		transcription regulator			0.00975	ACTA2,IFNG
TLR6		transmembrane receptor			0.00975	CCL5,IFNG
LILRB1		transmembrane receptor			0.00975	IFNG,PRDM1
HDAC1		transcription regulator			0.00977	CCL5,CDKN2A,HBG1,ITGAD,PPP2R2B,SMAD7
NOTCH1		transcription regulator		0.479	0.00977	ACTA2,CD84,CDCA7,IFNG,RUNX3,TGFBR3
FOXL2		transcription regulator			0.00996	CDKN2A,NFATC2,TNFAIP3
OTX2		transcription regulator			0.00996	EFNA5,PRDM1,RDH10

## Sheet: Reactome pathways
Reactome pathway analysis of 149 genes, significantly up-regulated in PLHIV versus HC and known to interact with each other.
name	nAnno	nOverlap	zscore	members_Overlap	members_Anno	group
Immune System	863	28	8.35	AP2B1, CBLB, CD3G, CD8A, CD8B, CRTAM, FYN, GBP1, GBP4, GBP5, HECTD3, IFNG, IL2RG, IL7, ITGAL, KLRD1, NLRC5, PIK3R3, PPP2R5C, RACGAP1, RAP1GAP, RAPGEF1, RASGRP1, SEC24C, TLR3, TNFAIP3, TXNIP, VCAM1	AAAS, ACTR1A, ACTR1B, ADAM17, ADAR, AGER, AIM2, AKT1, AKT1S1, AKT2, AKT3, ANAPC1, ANAPC10, ANAPC11, ANAPC13, ANAPC2, ANAPC4, ANAPC5, ANAPC7, AP1B1, AP1G1, AP1M1, AP1M2, AP1S1, AP1S2, AP2A1, AP2A2, AP2B1, AP2M1, AP2S1, APP, ARF1, ARIH1, ARIH2, ART1, ASB1, ASB11, ASB12, ASB13, ASB15, ASB16, ASB2, ASB3, ASB4, ASB5, ASB6, ASB7, ASB8, ASB9, ATF1, ATF2, ATG12, ATG5, ATG7, B2M, BAD, BCL10, BCL2, BCL2L1,…	10
Immunoregulatory interactions between a Lymphoid and a non-Lymphoid cell	64	7	9.19	CD3G, CD8A, CD8B, CRTAM, ITGAL, KLRD1, VCAM1	B2M, C3, CD160, CD19, CD200R1, CD226, CD247, CD34, CD3D, CD3E, CD3G, CD40, CD40LG, CD81, CD8A, CD8B, CD96, CDH1, CRTAM, CXADR, FCGR2B, FCGR3A, HCST, HLA-A, HLA-B, HLA-C, HLA-F, HLA-G, ICAM1, ICAM2, ICAM3, ICAM4, IFITM1, ITGAL, ITGB1, ITGB2, ITGB7, JAML, KIR2DL1, KIR2DL2, KIR2DL3, KIR2DL4, KIR2DS1, KIR2DS2, KIR3DL1, KIR3DL2, KLRC1, KLRD1, KLRK1, LILRA1, LILRB1, LILRB2, LILRB3, LILRB4, LILRB5, NECT…	11
Adaptive Immune System	512	17	6.56	AP2B1, CBLB, CD3G, CD8A, CD8B, CRTAM, FYN, HECTD3, ITGAL, KLRD1, PIK3R3, PPP2R5C, RACGAP1, RAP1GAP, RASGRP1, SEC24C, VCAM1	ACTR1A, ACTR1B, AKT1, AKT1S1, AKT2, AKT3, ANAPC1, ANAPC10, ANAPC11, ANAPC13, ANAPC2, ANAPC4, ANAPC5, ANAPC7, AP1B1, AP1G1, AP1M1, AP1M2, AP1S1, AP1S2, AP2A1, AP2A2, AP2B1, AP2M1, AP2S1, ARF1, ARIH2, ASB1, ASB11, ASB12, ASB13, ASB15, ASB16, ASB2, ASB3, ASB4, ASB5, ASB6, ASB7, ASB8, ASB9, ATG7, B2M, BAD, BCL10, BLK, BLMH, BLNK, BTK, BTLA, BTRC, C3, CALM1, CALM2, CALM3, CALR, CANX, CARD11, CASP9, CB…	1
Cytokine Signaling in Immune system	259	10	5.63	FYN, GBP1, GBP4, GBP5, IFNG, IL2RG, IL7, PIK3R3, RAPGEF1, VCAM1	AAAS, ADAM17, ADAR, ARIH1, B2M, BLNK, BTRC, CAMK2A, CAMK2B, CAMK2D, CASP1, CBL, CD44, CDK1, CHUK, CIITA, CISH, CRK, CRKL, CSF2, CSF2RA, CSF2RB, CSH1, CUL1, DDX58, EGR1, EIF2AK2, EIF4A1, EIF4A2, EIF4A3, EIF4E, EIF4E2, EIF4E3, EIF4G1, EIF4G2, EIF4G3, FCGR1A, FCGR1B, FLNB, FYN, GAB2, GBP1, GBP2, GBP4, GBP5, GBP6, GBP7, GH1, GH2, GHR, GRB2, HCK, HERC5, HGF, HLA-A, HLA-B, HLA-C, HLA-DPA1, HLA-DPB1, HL…	5
Interleukin-7 signaling	11	3	9.93	IL2RG, IL7, PIK3R3	HGF, IL2RG, IL7, IL7R, JAK1, JAK3, PIK3R1, PIK3R2, PIK3R3, STAT5A, STAT5B	15
Interferon gamma signaling	60	5	6.61	GBP1, GBP4, GBP5, IFNG, VCAM1	B2M, CAMK2A, CAMK2B, CAMK2D, CD44, CIITA, FCGR1A, FCGR1B, GBP1, GBP2, GBP4, GBP5, GBP6, GBP7, HLA-A, HLA-B, HLA-C, HLA-DPA1, HLA-DPB1, HLA-DQA1, HLA-DQA2, HLA-DRB1, HLA-DRB3, HLA-DRB5, HLA-F, HLA-G, ICAM1, IFNG, IFNGR1, IFNGR2, IRF1, IRF2, IRF3, IRF4, IRF5, IRF6, IRF7, IRF8, IRF9, JAK1, JAK2, MT2A, NCAM1, OAS1, OAS2, OAS3, OASL, PIAS1, PML, PRKCD, PTAFR, PTPN1, PTPN2, PTPN6, SOCS1, SOCS3, SP100, …	13
Regulation of signaling by CBL	18	3	7.62	FYN, PIK3R3, RAPGEF1	BLNK, CBL, CRK, CRKL, FYN, GRB2, HCK, LYN, PIK3CA, PIK3CB, PIK3CD, PIK3R1, PIK3R2, PIK3R3, RAPGEF1, SYK, VAV1, YES1	18
Interleukin-3, 5 and GM-CSF signaling	43	4	6.32	FYN, IL2RG, PIK3R3, RAPGEF1	BLNK, CBL, CRK, CRKL, CSF2, CSF2RA, CSF2RB, FYN, GAB2, GRB2, HCK, HRAS, IL2, IL2RA, IL2RB, IL2RG, IL3, IL3RA, IL5, IL5RA, INPPL1, JAK1, JAK2, JAK3, LYN, PIK3CA, PIK3CB, PIK3CD, PIK3R1, PIK3R2, PIK3R3, PRKACB, PTPN6, RAPGEF1, SHC1, SOS1, STAT5A, STAT5B, SYK, TEC, VAV1, YES1, YWHAZ	14
Hemostasis	440	11	4.1	CD2, F2R, FYN, GATA6, ITGAL, PIK3R3, PPP2R5C, RACGAP1, RASGRP1, TRPC3, WEE1	A2M, ABCC4, ABL1, ACTN1, ACTN2, ACTN4, ADRA2A, ADRA2B, AK3, AKAP1, AKAP10, AKT1, AKT2, AKT3, ALB, ALDOA, ANGPT1, ANGPT2, ANGPT4, APBB1IP, APOA1, APOB, APP, ARRB1, ARRB2, ATP1B1, ATP1B2, ATP1B3, ATP2A1, ATP2A2, ATP2A3, ATP2B2, ATP2B3, BCAR1, BRPF3, BSG, C1QBP, CABLES1, CABLES2, CALM1, CALM2, CALM3, CALU, CAP1, CAPZA1, CAPZA2, CAV1, CBX5, CD2, CD36, CD47, CD48, CD58, CD63, CD9, CDC42, CDK2, CDK5, C…	8
Chemokine receptors bind chemokines	55	4	5.44	CCL4, CCL5, CXCL9, CXCR3	ACKR2, ACKR3, ACKR4, CCL11, CCL16, CCL17, CCL19, CCL2, CCL20, CCL21, CCL22, CCL25, CCL27, CCL28, CCL3, CCL3L1, CCL3L3, CCL4, CCL5, CCL7, CCR1, CCR10, CCR2, CCR3, CCR4, CCR5, CCR6, CCR7, CCR8, CCR9, CX3CL1, CX3CR1, CXCL1, CXCL10, CXCL11, CXCL12, CXCL13, CXCL16, CXCL2, CXCL3, CXCL5, CXCL6, CXCL8, CXCL9, CXCR1, CXCR2, CXCR3, CXCR4, CXCR5, CXCR6, PF4, PPBP, XCL1, XCL2, XCR1	2
The role of Nef in HIV-1 replication and disease pathogenesis	27	3	6.07	AP2B1, CD8B, FYN	AP1B1, AP1G1, AP1M1, AP1M2, AP1S1, AP1S2, AP2A1, AP2A2, AP2B1, AP2M1, AP2S1, ARF1, ATP6V1H, B2M, CD247, CD28, CD4, CD8B, DOCK2, ELMO1, FYN, HCK, HLA-A, LCK, PACS1, PAK2, RAC1	20
Costimulation by the CD28 family	62	4	5.05	CD3G, FYN, PIK3R3, PPP2R5C	AKT1, AKT2, AKT3, BTLA, CD247, CD274, CD28, CD3D, CD3E, CD3G, CD4, CD80, CD86, CDC42, CSK, CTLA4, FYN, GRAP2, GRB2, HLA-DPA1, HLA-DPB1, HLA-DQA1, HLA-DQA2, HLA-DRB1, HLA-DRB3, HLA-DRB5, ICOS, ICOSLG, LCK, LYN, MAP3K14, MAP3K8, MAPKAP1, MLST8, MTOR, PAK1, PAK2, PDCD1, PDCD1LG2, PDPK1, PIK3CA, PIK3R1, PIK3R2, PIK3R3, PPP2CA, PPP2CB, PPP2R1A, PPP2R1B, PPP2R5A, PPP2R5B, PPP2R5C, PPP2R5D, PPP2R5E, PTP…	4
Signaling by Interleukins	106	5	4.58	FYN, IL2RG, IL7, PIK3R3, RAPGEF1	BLNK, BTRC, CASP1, CBL, CDK1, CHUK, CRK, CRKL, CSF2, CSF2RA, CSF2RB, CUL1, FYN, GAB2, GRB2, HCK, HGF, HRAS, IKBKB, IKBKG, IL18, IL1A, IL1B, IL1R1, IL1R2, IL1RAP, IL1RN, IL2, IL2RA, IL2RB, IL2RG, IL3, IL3RA, IL5, IL5RA, IL6, IL6R, IL6ST, IL7, IL7R, INPPL1, IRAK1, IRAK2, IRAK3, IRAK4, JAK1, JAK2, JAK3, KRAS, LCK, LYN, MAP2K1, MAP2K2, MAP2K4, MAP2K6, MAP3K3, MAP3K7, MAP3K8, MAPK1, MAPK3, MYD88, NFKB…	19
Interferon Signaling	149	5	3.55	GBP1, GBP4, GBP5, IFNG, VCAM1	AAAS, ADAR, ARIH1, B2M, CAMK2A, CAMK2B, CAMK2D, CD44, CIITA, DDX58, EGR1, EIF2AK2, EIF4A1, EIF4A2, EIF4A3, EIF4E, EIF4E2, EIF4E3, EIF4G1, EIF4G2, EIF4G3, FCGR1A, FCGR1B, FLNB, GBP1, GBP2, GBP4, GBP5, GBP6, GBP7, HERC5, HLA-A, HLA-B, HLA-C, HLA-DPA1, HLA-DPB1, HLA-DQA1, HLA-DQA2, HLA-DRB1, HLA-DRB3, HLA-DRB5, HLA-F, HLA-G, ICAM1, IFI27, IFI35, IFI6, IFIT1, IFIT2, IFIT3, IFITM1, IFITM2, IFITM3, IFN…	13
G alpha (q) signalling events	163	5	3.3	F2R, LPAR1, PIK3R3, RASGRP1, TRPC3	ADRA1A, AGT, AGTR1, ANXA1, APP, ARHGEF25, AVP, AVPR1A, AVPR1B, BDKRB1, BDKRB2, BRS3, CASR, CCK, CCKBR, CHRM1, CHRM3, CHRM5, CYSLTR1, CYSLTR2, DAGLA, DAGLB, DGKA, DGKB, DGKD, DGKE, DGKG, DGKH, DGKI, DGKK, DGKQ, EDN1, EDN2, EDN3, EDNRA, EDNRB, F2, F2R, F2RL1, F2RL2, F2RL3, FFAR1, FFAR2, FFAR3, FPR2, GCG, GHRL, GHSR, GNA11, GNA14, GNA15, GNAQ, GNB1, GNB2, GNB3, GNB4, GNB5, GNG10, GNG11, GNG12, GNG13…	7
Peptide ligand-binding receptors	167	5	3.23	CCL4, CCL5, CXCL9, CXCR3, F2R	ACKR1, ACKR2, ACKR3, ACKR4, AGT, AGTR1, AGTR2, ANXA1, APLNR, APP, AVP, AVPR1A, AVPR1B, AVPR2, BDKRB1, BDKRB2, BRS3, C3, C3AR1, C5, C5AR1, C5AR2, CCK, CCKBR, CCL11, CCL16, CCL17, CCL19, CCL2, CCL20, CCL21, CCL22, CCL25, CCL27, CCL28, CCL3, CCL3L1, CCL3L3, CCL4, CCL5, CCL7, CCR1, CCR10, CCR2, CCR3, CCR4, CCR5, CCR6, CCR7, CCR8, CCR9, CX3CL1, CX3CR1, CXCL1, CXCL10, CXCL11, CXCL12, CXCL13, CXCL16, CX…	3
Host Interactions of HIV factors	120	4	3.16	AP2B1, APOBEC3G, CD8B, FYN	AAAS, AP1B1, AP1G1, AP1M1, AP1M2, AP1S1, AP1S2, AP2A1, AP2A2, AP2B1, AP2M1, AP2S1, APOBEC3G, ARF1, ATP6V1H, B2M, BANF1, BTRC, CCNT1, CD247, CD28, CD4, CD8B, CDK9, CUL5, DOCK2, ELMO1, ELOB, ELOC, FYN, HCK, HLA-A, HMGA1, KPNA1, KPNB1, LCK, NPM1, NUP107, NUP133, NUP153, NUP155, NUP188, NUP205, NUP210, NUP214, NUP35, NUP37, NUP43, NUP50, NUP54, NUP58, NUP62, NUP85, NUP88, NUP93, NUPL2, PACS1, PAK2, P…	9
G alpha (i) signalling events	184	5	2.97	CCL5, CXCL9, CXCR3, LPAR1, RGS9	ACKR3, ADCY1, ADCY2, ADCY3, ADCY4, ADCY5, ADCY6, ADCY7, ADCY8, ADCY9, ADORA1, ADORA3, ADRA2A, ADRA2B, AGT, AGTR2, ANXA1, APLNR, APP, BDKRB1, BDKRB2, C3, C3AR1, C5, C5AR1, CASR, CCL16, CCL19, CCL20, CCL21, CCL25, CCL27, CCL28, CCL5, CCR1, CCR10, CCR2, CCR3, CCR4, CCR5, CCR6, CCR7, CCR8, CCR9, CHRM2, CNR1, CNR2, CXCL1, CXCL10, CXCL11, CXCL12, CXCL13, CXCL16, CXCL2, CXCL3, CXCL5, CXCL6, CXCL8, CXCL9…	6
Gastrin-CREB signalling pathway via PKC and MAPK	184	5	2.97	F2R, LPAR1, PIK3R3, RASGRP1, TRPC3	ADRA1A, AGT, AGTR1, ANXA1, APP, ARHGEF25, AVP, AVPR1A, AVPR1B, BDKRB1, BDKRB2, BRS3, CASR, CCK, CCKBR, CDK1, CHRM1, CHRM3, CHRM5, CREB1, CYSLTR1, CYSLTR2, DAGLA, DAGLB, DGKA, DGKB, DGKD, DGKE, DGKG, DGKH, DGKI, DGKK, DGKQ, EDN1, EDN2, EDN3, EDNRA, EDNRB, EGFR, F2, F2R, F2RL1, F2RL2, F2RL3, FFAR1, FFAR2, FFAR3, FPR2, GCG, GHRL, GHSR, GNA11, GNA14, GNA15, GNAQ, GNB1, GNB2, GNB3, GNB4, GNB5, GNG10, …	7
Integrin cell surface interactions	75	3	3.15	ITGAL, RASGRP1, VCAM1	AKT1, APBB1IP, BCAR1, BSG, CDH1, COL1A1, COL1A2, COL2A1, COL4A1, COL4A2, COL4A3, COL4A4, COL4A5, CRK, CSK, F11R, FBN1, FN1, GRB2, ICAM1, ICAM2, ICAM3, ICAM4, ITGA1, ITGA10, ITGA11, ITGA2, ITGA2B, ITGA3, ITGA5, ITGA8, ITGA9, ITGAE, ITGAL, ITGAM, ITGAV, ITGAX, ITGB1, ITGB2, ITGB3, ITGB4, ITGB5, ITGB6, ITGB7, ITGB8, JAM2, JAM3, JAML, LAMA1, LAMA2, LAMA5, LAMB1, LAMB2, LAMC1, PDPK1, PECAM1, PTK2, PTP…	12
Neurotransmitter Receptor Binding And Downstream Transmission In The Postsynaptic Cell	134	4	2.88	AP2B1, DLG3, MYO6, NCALD	ACTN2, ADCY1, ADCY2, ADCY3, ADCY4, ADCY5, ADCY6, ADCY7, ADCY8, ADCY9, AKAP5, AKAP9, AP2A1, AP2A2, AP2B1, AP2M1, AP2S1, ARHGEF9, BRAF, CACNG2, CACNG3, CACNG4, CACNG8, CALM1, CALM2, CALM3, CAMK2A, CAMK2B, CAMK2D, CAMK4, CAMKK1, CHRFAM7A, CHRNA1, CHRNA2, CHRNA3, CHRNA4, CHRNA5, CHRNA6, CHRNA7, CHRNA9, CHRNB2, CHRNB3, CHRNB4, CHRND, CHRNE, CHRNG, CREB1, DLG1, DLG3, EPB41L1, GABBR1, GABBR2, GABRA1, GA…	16
Platelet activation, signaling and aggregation	194	5	2.83	F2R, FYN, PIK3R3, RASGRP1, TRPC3	A2M, ABCC4, ACTN1, ACTN2, ACTN4, ADRA2A, ADRA2B, AKT1, AKT2, AKT3, ALB, ALDOA, APBB1IP, APOA1, APP, ARRB1, ARRB2, BCAR1, BRPF3, CALM1, CALM2, CALM3, CALU, CAP1, CD36, CD63, CD9, CDC42, CFD, CFL1, CLU, COL1A1, COL1A2, CRK, CSK, DAGLA, DAGLB, DGKA, DGKB, DGKD, DGKE, DGKG, DGKH, DGKI, DGKK, DGKQ, EGF, F13A1, F2, F2R, F2RL2, F2RL3, F5, F8, FCER1G, FN1, FYN, GNA11, GNA12, GNA13, GNA14, GNA15, GNAI1, G…	17
Class A/1 (Rhodopsin-like receptors)	271	6	2.67	CCL4, CCL5, CXCL9, CXCR3, F2R, LPAR1	ACKR1, ACKR2, ACKR3, ACKR4, ADORA1, ADORA2A, ADORA2B, ADORA3, ADRA1A, ADRA2A, ADRA2B, ADRB1, ADRB2, ADRB3, AGT, AGTR1, AGTR2, ANXA1, APLNR, APP, AVP, AVPR1A, AVPR1B, AVPR2, BDKRB1, BDKRB2, BRS3, C3, C3AR1, C5, C5AR1, C5AR2, CCK, CCKBR, CCL11, CCL16, CCL17, CCL19, CCL2, CCL20, CCL21, CCL22, CCL25, CCL27, CCL28, CCL3, CCL3L1, CCL3L3, CCL4, CCL5, CCL7, CCR1, CCR10, CCR2, CCR3, CCR4, CCR5, CCR6, CCR7…	3
